# Supplementary material
Source: PubMed Central journal article supplement (PMC7724152)

UMR INSERM1173 Infection et Inflammation  
Université de Versailles St-Quentin-en-Yvelines

Prof Elyanne GAULT, MD, PhD  
Tel : +33 1 4909 5545  
E-mail: elyanne.gault@uvsq.fr

Paris, October 27<sup>th</sup> 2020

Dear Editor

I agree to appear in the acknowledgements of the article "Metabolomics of exhaled breath in critically ill COVID-19 patients".

Yours sincerely,

Elyanne GAULT



Supplement: mmc2.pdf [file mmc2.pdf]
