# Supplementary material
Source: PubMed Central journal article supplement (PMC7724152)

UMR INSERM1173 Infection et Inflammation  
Université de Versailles St-Quentin-en-Yvelines

Pr. Marie-Anne Rameix-Welti  
Tel : +33 (0)6 65 13 64 34  
E-mail: marie-anne.rameix-welti@uvsq.fr

Paris, October the 22th 2020

Dear Editor

I agree to appear in the acknowledgements of the article "Metabolomics of exhaled breath in critically ill COVID-19 patients".

Yours sincerely,

Marie-Anne Rameix-Welti



Supplement: mmc3.pdf [file mmc3.pdf]
