# Supplementary material
Source: PubMed Central journal article supplement (PMC7724152)
Supplement: mmc4.pdf [file mmc4.pdf]

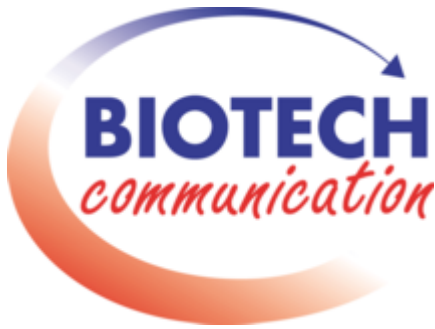

Biotech Communication SARL  
9 rue de Kerorlaes, Portsall  
F-29830 PLOUDALMEZEAU  
FRANCE

tel.: +33-967-444-263

info@biotechcommunication.com www.biotechcommunication.com

A limited company registered in France (424 869 253 00023)

---

October 21<sup>st</sup>, 2020

## To whom it may concern

Having copy-edited various versions of the manuscript entitled "**Metabolomics of exhaled breath in critically ill COVID-19 patients**" by Grassin-Delyle et al., I hereby agree to be cited in the Acknowledgements section.

A handwritten signature in black ink, which appears to read "David Fraser".

David Fraser D.Phil.

Owner-Manager, Biotech Communication SARL
